# Supplementary material for: A transdermal drug delivery system based on dissolving microneedles for boron neutron capture therapy of melanoma
Source: Royal Society of Chemistry journal article supplement (doi:10.1039/d3bm01262j), 2023-01-01
Supplement: d3bm01262j1.pdf [file d3bm01262j1.pdf]

## Supporting Information

# The Transdermal Drug Delivery System Based on Dissolving Microneedles for Boron Neutron Capture Therapy of Melanoma

Jiaxin Li,<sup>†a</sup> Xueyi Wang,<sup>†\*bc</sup> Zhaoshuo Wang,<sup>d</sup> Yu Zhao,<sup>a</sup> Ziyang Zhang,<sup>a</sup>  
Lanya Li,<sup>bc</sup> Dandan Ding,<sup>bc</sup> Junshu Guo,<sup>bc</sup> Jinchao Zhang,<sup>a</sup> Huifang Liu,<sup>\*a</sup>  
Zhenhua Li<sup>\*bc</sup>

- a. College of Pharmaceutical Science, Key Laboratory of Pharmaceutical Quality Control of Hebei Province, Hebei University, Baoding, 071002, China.
- b. The 10th Affiliated Hospital of Southern Medical University, Dongguan, 523059, China.
- c. Guangdong Provincial Key Laboratory of Cardiac Function and Microcirculation, 510280, Guangzhou, China.
- d. College of Chemistry & Environmental Science, Key Laboratory of Medicinal Chemistry and Molecular Diagnosis of Ministry of Education, Chemical Biology Key Laboratory of Hebei Province, Hebei University, Baoding, 071002, China.

\* Corresponding authors: Zhenhua Li, Email: [zhenhuali@hbu.edu.cn](mailto:zhenhuali@hbu.edu.cn)

Huifang Liu, Email: [liu-huifang@163.com](mailto:liu-huifang@163.com)

Xueyi Wang, Email: [ixueyi@smu.edu.cn](mailto:ixueyi@smu.edu.cn)

<sup>†</sup> J.L. and X.W. contributed equally to this work.

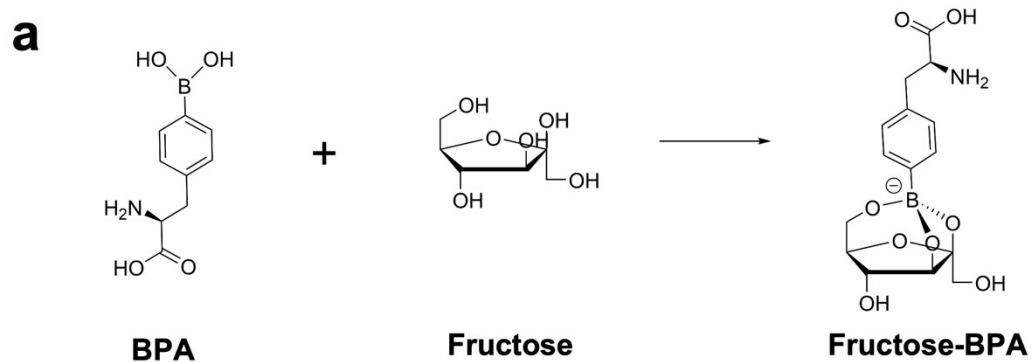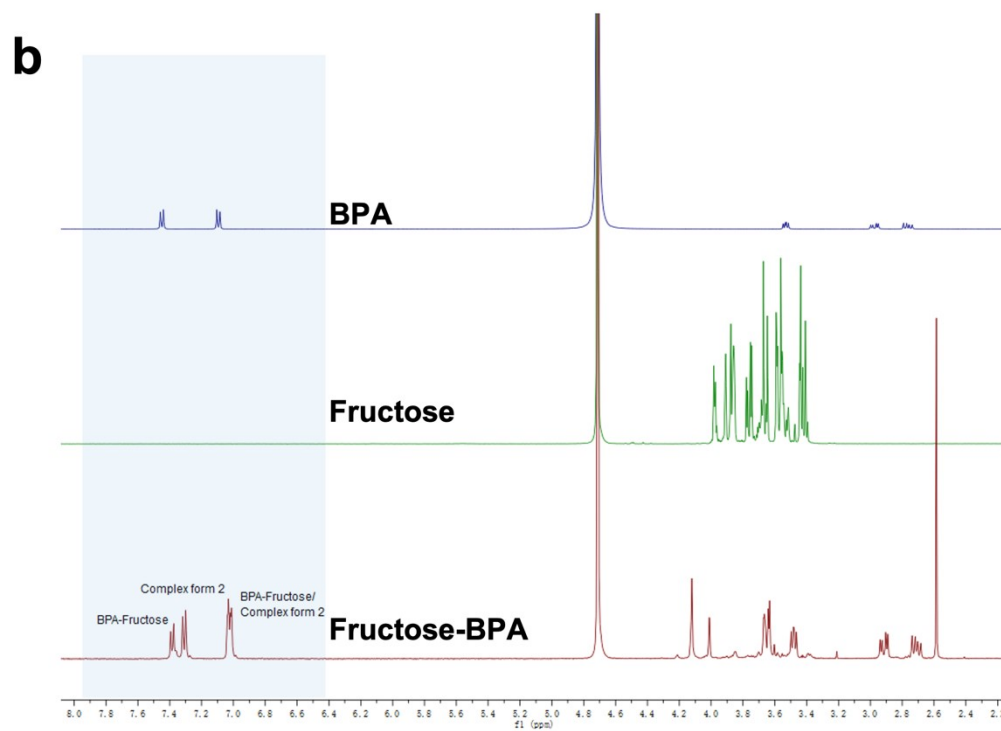

**Figure S1.** (a) The synthesis route of fructose-BPA. (b)  $^1\text{H}$  NMR spectra ( $\text{D}_2\text{O}$ ) comparison of BPA, fructose and fructose-BPA.

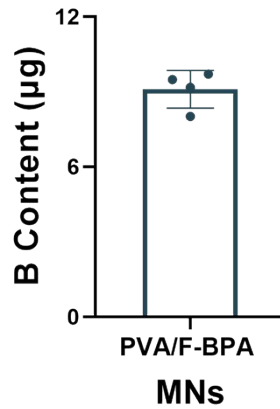

**Figure S2.** The  $^{10}\text{B}$  content in microneedle tips of one patch of PVA/F-BPA MNs.

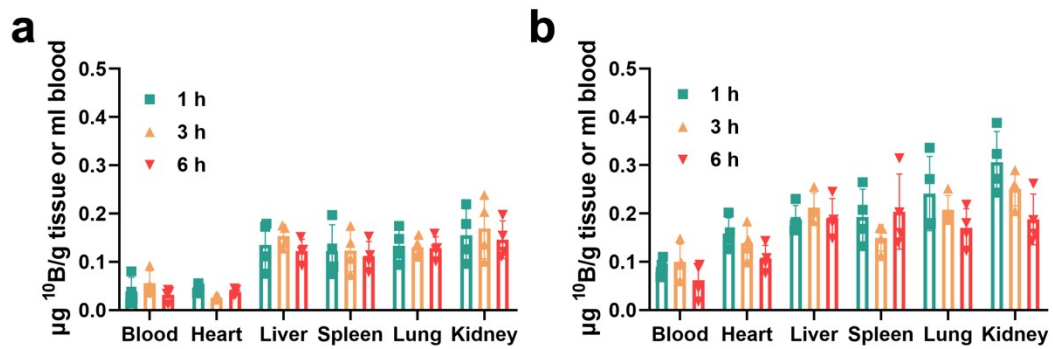

**Figure S3.** (a) The  $^{10}\text{B}$  concentration ( $n = 4$ ) in blood and organs measured by ICP-OES at different time after the penetration of one single patch of PVA/F-BPA MNs. (b) The  $^{10}\text{B}$  concentration ( $n = 4$ ) in blood and organs measured by ICP-OES at different time after the penetration of two patches of PVA/F-BPA MNs. (\* $P < 0.05$ )

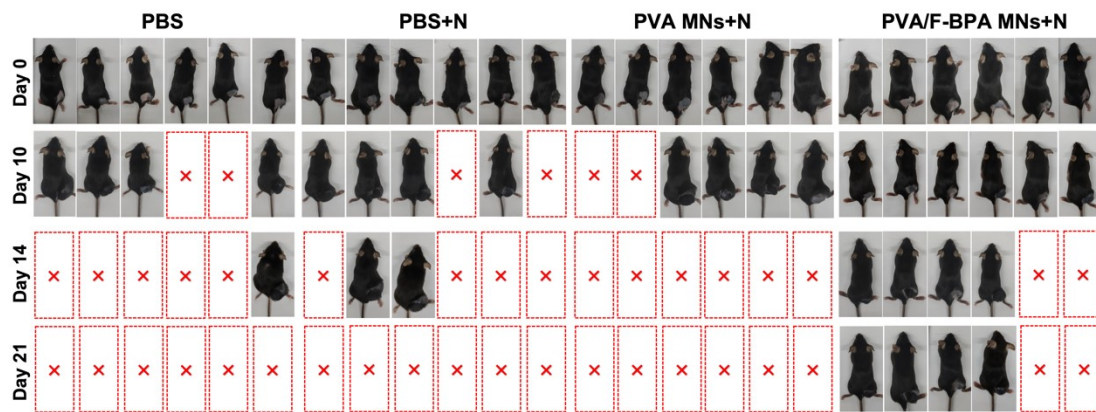

**Figure S4.** Images of B16-F10 melanoma-bearing mice before and during the treatment process of PVA/F-BPA MNs-BNCT therapy.

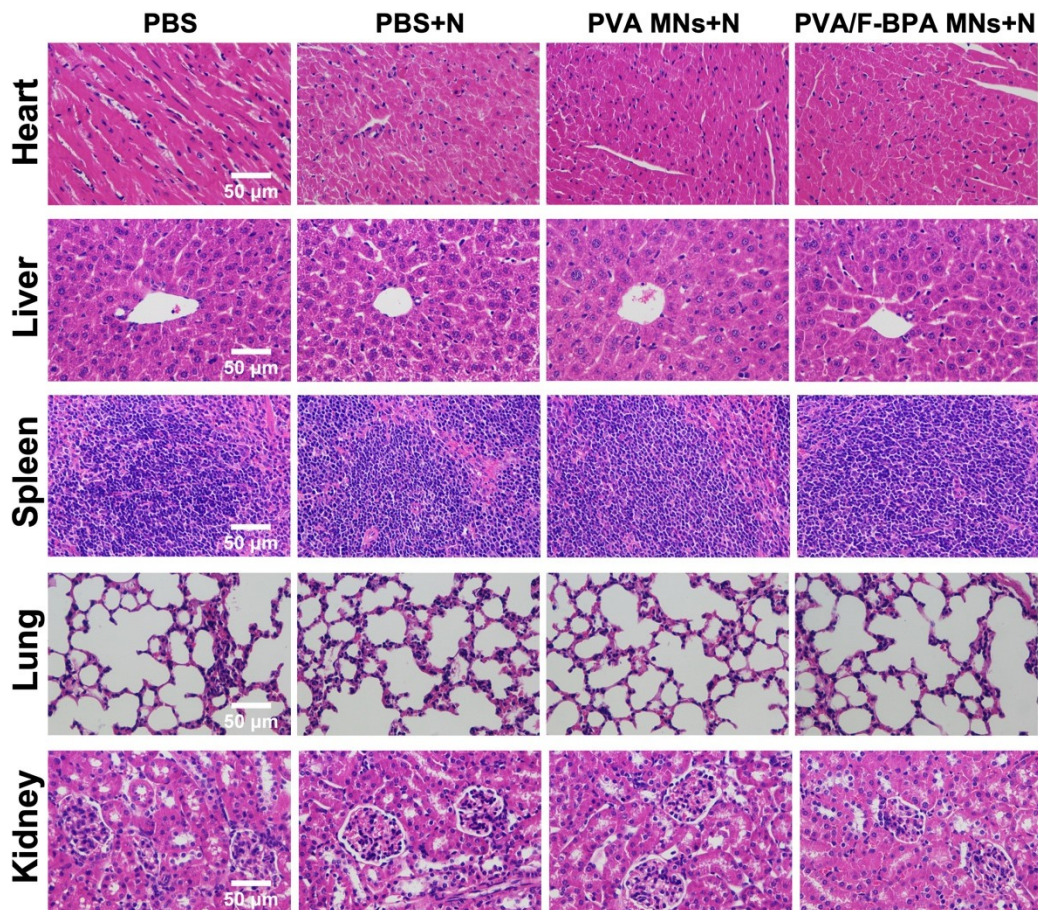

**Figure S5.** H&E staining of major organs from various treated groups collected 21 days after the indicated treatments.
